# Supplementary material
Source: MDPI journal article supplement (https://www.mdpi.com/2311-5521/6/12/455)
Supplement: s1 [file s1]

Archive with 1 entries (1 files):
- fluids-1270493-supplementary-materials.pdf
